# Supplementary material for: Molecular Architecture of the ATP-Dependent Chromatin-Remodeling Complex SWR1
Source: PubMed Central journal article supplement (PMC3776929; doi:10.1016/j.cell.2013.08.018), 2013-09-12
Supplement: mmc2.pdf [file mmc2.pdf]

**Table S1. Yeast Strains Used in This Study, Related to the Experimental Procedures**

|                              |                                                               |                         |
|------------------------------|---------------------------------------------------------------|-------------------------|
| SWR1-3Flag<br><i>htz1Δ</i>   | <i>W1588C-4C swr1::SWR1-3Flag-P-KanMX-P<br/>htz1Δ::natMX4</i> | Kind gift of Wei-hua Wu |
| SWR1-2Flag<br>( $\Delta$ N2) | <i>W1588-4C swr1::natMX [pRS416-swr1ΔN2-2Flag]</i>            | Wei-hua et al<br>2006   |
| SWR1-Flag<br><i>arp6Δ</i>    | <i>W1588-4C SWR1-3Flag kanMX4 arp6::hphMX6 htz1::natMX</i>    | Wei-hua et al<br>2006   |

This table lists the *S.cerevisiae* strains used in this study. The three strains were the sources of the SWR1 (top), SWR1- $\Delta$ N-Module (middle) and SWR1- $\Delta$ C-Module (bottom) complexes.

**Table S2. Inter- and Intraprotein Crosslinks Identified, Related to Figure 5**

**INTERPROTEIN CROSSLINKS**

| Crosslinked peptides (Protein1-Protein2) | Protein1     | Xlink1 (AA) | Protein2    | Xlink2 (AA) | Cα-Cα (Å) | Id score |
|------------------------------------------|--------------|-------------|-------------|-------------|-----------|----------|
| HQGIMVGMGQKDSYVGDEAQSQR-TKSNESR          | P60010 ACT1  | K50         | P38326 SWC5 | K205        |           | 37.31    |
| LLAQAEDEDDVKAANLAMR-TKSNESR              | Q05471 SWR1  | K1456       | P38326 SWC5 | K205        |           | 33.74    |
| KIIQERIR-SKGRSGSK                        | Q03388 VPS72 | K218        | P35817 BDF1 | K504        |           | 33.21    |
| GLGLDESGVAKRVEGGFVQIEAR-FAVQAVKQR        | Q03940 RVB1  | K42         | Q05471 SWR1 | K418        |           | 32.2     |
| FAPGFKVLTYYGSPQQR-EKGVK                  | Q05471 SWR1  | K772        | P31376 SWC3 | K407        |           | 30.55    |
| SAAEIAEEEEALVVESKK-SSTKARIAR             | P53201 SWC4  | K262        | Q05471 SWR1 | K371        |           | 30.05    |
| FINHLIKKALEPK-EIEKFKTK                   | P80428 ARP4  | K195        | P31376 SWC3 | K498        |           | 29.43    |
| HKEQESQHMLTQEER-KSIGIK                   | Q03388 VPS72 | K228        | Q12464 RVB2 | K123        |           | 29.19    |
| LLSSSGKVGSVLDGSKEAR-LENLVKQEAINGS        | P38326 SWC5  | K138        | P53930 YAF9 | K219        |           | 28.5     |
| NDYVPLKR-KKYLQR                          | P80428 ARP4  | K323        | P53201 SWC4 | K238        |           | 26.85    |
| LLSSSGKVGSVLDGSKEAR-ETDSLQPITSKEIK       | P38326 SWC5  | K138        | Q05471 SWR1 | K326        |           | 26.64    |
| STKILETSANYL-GVSKTR                      | Q03940 RVB1  | K454        | Q12464 RVB2 | K331        | 14.5Å     | 26.33    |
| HQGIMVGMGQKDSYVGDEAQSQR-TKSNESR          | P60010 ACT1  | K61         | P38326 SWC5 | K205        |           | 25.82    |
| TAAHTHIKGLGLDESGVAKR-SDKQVTPTEEK         | Q03940 RVB1  | K31         | P80428 ARP4 | K335        |           | 25.1     |

**INTRAPROTEIN CROSSLINKS**

| Crosslinked peptides (Protein1-Protein2) | Protein1     | Xlink1 (AA) | Protein2     | Xlink2 (AA) | AA1-AA2 | Cα-Cα (Å) | Id score |
|------------------------------------------|--------------|-------------|--------------|-------------|---------|-----------|----------|
| RAAGVILKMVQNGTIAGR-GVSKTR                | Q12464 RVB2  | K59         | Q12464 RVB2  | K331        | 272     | 33.6Å     | 44.18    |
| IEESGGLIKTR-NKVDYSR                      | P38326 SWC5  | K79         | P38326 SWC5  | K64         | 15      |           | 38.33    |
| SNSGVVKTWR-NDYVPLKR                      | P80428 ARP4  | K313        | P80428 ARP4  | K323        | 10      | 26.0Å     | 38.27    |
| KSESAYAEQLLK-QRQEMQTALKR                 | P53201 SWC4  | K372        | P53201 SWC4  | K370        | 2       |           | 38.01    |
| STTAAQQEDKILIER-VGSVLDGSKEAR             | P38326 SWC5  | K151        | P38326 SWC5  | K138        | 13      |           | 37.34    |
| STTAAQQEDKILIER-TKSNESR                  | P38326 SWC5  | K151        | P38326 SWC5  | K205        | 54      |           | 37.08    |
| SNSGVVKTWR-NDYVPLKR                      | P80428 ARP4  | K313        | P80428 ARP4  | K323        | 10      | 26.0Å     | 36.76    |
| SIITTKSYNEQEIK-GVSKTR                    | Q12464 RVB2  | K357        | Q12464 RVB2  | K331        | 26      | 23.9Å     | 36.65    |
| AGLNDELVLHNDGFLAR-VGSAEDERYKELR          | P38326 SWC5  | K263        | P38326 SWC5  | K285        | 22      |           | 36.61    |
| GTNYKSPHGLPLDLLDR-GVSKTR                 | Q12464 RVB2  | K338        | Q12464 RVB2  | K331        | 7       | 4.1Å      | 35.52    |
| FGPSTNKKPFRR-SYKGEEMR                    | Q12509 ARP6  | K23         | Q12509 ARP6  | K144        | 121     |           | 34.91    |
| RKSESAYAEQLLK-QEMQTALKR                  | P53201 SWC4  | K372        | P53201 SWC4  | K370        | 2       |           | 34.13    |
| LKTVVTYDMKR-DKKNK                        | P35817 BDF1  | K525        | P35817 BDF1  | K520        | 5       |           | 33.06    |
| IEESGGLIKTRR-NKVDYSR                     | P38326 SWC5  | K79         | P38326 SWC5  | K64         | 15      |           | 32.75    |
| VGSAEDERYKELR-TKSNESR                    | P38326 SWC5  | K285        | P38326 SWC5  | K205        | 80      |           | 32.68    |
| KDEEQLKR-WNMAEKAYR                       | Q05471 SWR1  | K433        | Q05471 SWR1  | K426        | 7       |           | 32.54    |
| AGLNDELVLHNDGFLAR-TKSNESR                | P38326 SWC5  | K263        | P38326 SWC5  | K205        | 58      |           | 32.54    |
| FAVQAVKQR-WNMAEKAYR                      | Q05471 SWR1  | K418        | Q05471 SWR1  | K426        | 8       |           | 32.1     |
| KTVVHTVSLHEIDVINSR-ASGKITK               | Q12464 RVB2  | K233        | Q12464 RVB2  | K198        | 35      | 13.5Å     | 32.04    |
| SNSGVVKTWR-FINHLIKK                      | P80428 ARP4  | K313        | P80428 ARP4  | K195        | 118     | 31.5Å     | 31.37    |
| SDIKRDETTNEDSDQVR-                       | Q03388 VPS72 | K754        | Q03388 VPS72 | K746        | 8       |           | 31.02    |

|                                                             |             |      |             |      |    |       |  |       |  |
|-------------------------------------------------------------|-------------|------|-------------|------|----|-------|--|-------|--|
| IQDPIS <u>K</u> EEGR                                        |             |      |             |      |    |       |  |       |  |
| <u>K</u> SESAYAEQLLKDFNSDER-<br>QRQEMQTAL <u>K</u> R        | P53201 SWC4 | K372 | P53201 SWC4 | K370 | 2  |       |  | 30.66 |  |
| FINHLI <u>K</u> K-KPEFI <u>K</u> K                          | P80428 ARP4 | K195 | P80428 ARP4 | K218 | 23 | 19.5Å |  | 30.04 |  |
| GS <u>K</u> KR-IR <u>K</u> ER                               | P35817 BDF1 | K497 | P35817 BDF1 | K488 | 9  |       |  | 29.96 |  |
| FAVQAV <u>K</u> KR-WNMAE <u>K</u> AYR                       | Q05471 SWR1 | K418 | Q05471 SWR1 | K426 | 8  |       |  | 29.59 |  |
| ILR <u>K</u> DEEEQLK-WNMAE <u>K</u> AYR                     | Q05471 SWR1 | K433 | Q05471 SWR1 | K426 | 7  |       |  | 29.54 |  |
| E <u>K</u> VLAGDVISIDKASGK-<br>SITGGH <u>K</u> QGK          | Q12464 RVB2 | K183 | Q12464 RVB2 | K154 | 29 | 19.5Å |  | 29.17 |  |
| ETHLSLEERGE <u>K</u> FTDDVAK-<br><u>K</u> GTNGDLTR          | Q05471 SWR1 | K74  | Q05471 SWR1 | K82  | 8  |       |  | 28.88 |  |
| HK <u>K</u> SLAR-KA <u>K</u> EEER                           | Q05471 SWR1 | K407 | Q05471 SWR1 | K400 | 7  |       |  | 28.84 |  |
| HK <u>K</u> SLAR-KA <u>K</u> EEER                           | Q05471 SWR1 | K407 | Q05471 SWR1 | K400 | 7  |       |  | 28.34 |  |
| WNMAE <u>K</u> AYRILR- <u>K</u> DEEEQLKR                    | Q05471 SWR1 | K426 | Q05471 SWR1 | K433 | 7  |       |  | 27.87 |  |
| GTNY <u>K</u> SPHGLPLDLLDR-GVS <u>K</u> TR                  | Q12464 RVB2 | K338 | Q12464 RVB2 | K331 | 7  | 4.1Å  |  | 27.26 |  |
| <u>K</u> VTPTEEKEQEAVSK-<br>TKPSGVN <u>K</u> SDK            | P80428 ARP4 | K336 | P80428 ARP4 | K332 | 4  | N/A   |  | 26.23 |  |
| ST <u>K</u> ILETSANYL-LLFLDA <u>K</u> R                     | Q03940 RVB1 | K454 | Q03940 RVB1 | K450 | 4  | 4.9Å  |  | 26.19 |  |
| ADDENAE <u>K</u> QQSKEAK-<br>SSKTAATEPEP <u>K</u> K         | P31376 SWC3 | K380 | P31376 SWC3 | K371 | 9  |       |  | 25.41 |  |
| YGFAEELFLP <u>K</u> EDDIPANWPR-<br>TLEET <u>K</u> TELSSTAKR | P80428 ARP4 | K296 | P80428 ARP4 | K259 | 37 | 21.2Å |  | 25.35 |  |

This table lists all the crosslinked species identified with an Id score > 25. The crosslinked peptides are shown with single-letter code, separated by a dash (first column). The crosslinked lysines are indicated in red and underlined. Columns 2 and 4 identify the proteins that gave source to the first and second peptides in the crosslinked species, respectively. Columns 3 and 5 indicate the positions of the crosslinked lysine residues in the full-length proteins for the first and second peptides in the crosslinked species, respectively. Column 6, which refers only to intraprotein crosslinks, indicates the distance, in residues, between the two crosslinked lysines. Column 7 shows the distance, in Å, between the  $\alpha$  carbons of the crosslinked lysines whenever a crystal structure is available. The distance reported for the crosslink between Rvb1 and Rvb2 was measured using the homology model we generated for the *S.cerevisiae* heterohexamer (see Supplementary Methods). Column 8 reports the Id scores.
